# Supplementary material
Source: PubMed Central journal article supplement (PMC3052848)
Supplement: epi0507_0645SD1.pdf [file epi0507_0645SD1.pdf]

| <b>Table S1. Sequences and assay parameters for promoter amplification</b> |                                                                                                                                               |                  |                                                                              |
|----------------------------------------------------------------------------|-----------------------------------------------------------------------------------------------------------------------------------------------|------------------|------------------------------------------------------------------------------|
| <b>Gene Symbol</b>                                                         | <b>Sequences</b>                                                                                                                              | <b># of CpGs</b> | <b>Cycle Conditions</b>                                                      |
| <b>PYCARD</b>                                                              | Forward 5' – GGAGATTAGAGTGGGAGGAA – 3'<br>Reverse 5' – Biotin - CACCCACAACAACCTCAACTTAA – 3'<br>Sequencing 5' – TTTGGTAGGAGGTTGTA – 3'        | 12               | 95°C 15 min; 45 x (95°C 30 s; 56°C 30 s; 72°C 30 s);<br>72°C 5 min; 4°C Hold |
| <b>CDH1</b>                                                                | Forward – 5'-ATTTTAGTAATTTTAGGTTAGAGGGTTA - 3'<br>Reverse 5' – Biotin -ACCACAACCAATCAACAAC – 3'<br>Sequencing – 5'-ATTTTAGGTTAGAGGGTTAT – 3'  | 9                | 95°C 15 min; 45 x (95°C 30 s; 52°C 30 s; 72°C 30 s);<br>72°C 5 min; 4°C Hold |
| <b>GSTP1</b>                                                               | Forward – 5'- GGGGYGGGATTATTTTATAAG – 3'<br>Reverse 5' – Biotin - AATTAACCCCATACTAAAACTCT – 3'<br>Sequencing – 5' – GGATTATTTTATAAGGT – 3'    | 13               | 95°C 15 min; 45 x (95°C 30 s; 55°C 30 s; 72°C 30 s);<br>72°C 5 min; 4°C Hold |
| <b>RBP1</b>                                                                | Forward 5' – GGGAGGAGAGATAGTTATAATGGATT – 3'<br>Reverse 5' – Biotin - CCAACATCTCCAATACCCAATAA – 3'<br>Sequencing 5' – ATGGATTTTCTYGTAGGT – 3' | 14               | 95°C 15 min; 45 x (95°C 30 s; 51°C 30 s; 72°C 30 s);<br>72°C 5 min; 4°C Hold |
| <b>SFRP1</b>                                                               | Forward 5' - GAGTCGCGTTTGGTTTTAGTAAA – 3'<br>Reverse 5' – Biotin – AACTCCTACCACCAAACCCTC – 3'<br>Sequencing 5'- GTTTGGTTTTAGTAAAT – 3'        | 8                | 95°C 15 min; 45 x (95°C 30 s; 51°C 30 s; 72°C 30 s);<br>72°C 5 min; 4°C Hold |
| <b>RASSF1</b>                                                              | Forward – 5'- AGTTTGGATTTTGGGGGAGG - 3'<br>Reverse 5' – Biotin – CAACTCAATAAACTCAAACCTCCCC – 3'<br>Sequencing – 5'- GGGTTCGTTTTGTGGTTT – 3'   | 9                | 95°C 15 min; 45 x (95°C 30 s; 55°C 30 s; 72°C 30 s);<br>72°C 5 min; 4°C Hold |
